# Supplementary material
Source: Research Square preprint supplement (doi:10.21203/rs.3.rs-8547872/v1)
Supplement: Supplementary file 1 [file b555b879f11f2c13d46b8c45.docx]

| **Section / Item** | **Item No.** | **Location in Manuscript (Section/Page)** |
| --- | --- | --- |
| **Title & Abstract** | **1a & 1b** | Title and Abstract |
| **Trial Registration** | **2** | Ethical Considerations and Abstract |
| **Protocol Access** | **3** | Availability of Data |
| **Funding & COI** | **5a & 5b** | Funding and Conflicts of Interest |
| **Introduction** | **6 & 7** | Background and Objectives |
| **Trial Design** | **9** | Study Design (Randomized, double-blind, 1:1) |
| **Settings** | **11** | Study Design and Setting |
| **Eligibility** | **12a** | Participants Section |
| **Interventions** | **13** | Intervention Section (Betahistine 8mg vs. Placebo) |
| **Outcomes** | **14 & 15** | Outcomes Section and Adverse Events |
| **Sample Size** | **16a** | Sample Size Calculation |
| **Sequence Gen.** | **17a** | Randomization (Computer-generated block randomization) |
| **Concealment** | **18** | Randomization (Sequentially numbered, opaque envelopes) |
| **Blinding** | **20a** | Randomization (Double-blinded: patients and assessors) |
| **Statistical Methods** | **21a** | Statistical Analysis (SPSS v26, Kaplan–Meier) |
| **Participant Flow** | **22a** | Results and Figure 1 (CONSORT flow diagram) |
| **Baseline Data** | **25** | Table 1 |
| **Outcomes Reported** | **26** | Results and Tables 2, 3, 4 |
| **Adverse Events** | **27** | Adverse Events and Table 5 |
| **Limitations** | **30** | Discussion Section |
